# Supplementary material for: Three-dimensional printing of patient-specific computed tomography lung phantoms: a reader study
Source: PubMed Central journal article supplement — PNAS Nexus. 2023 Feb 1;2(3):pgad026. doi: 10.1093/pnasnexus/pgad026 (PMC9992761; doi:10.1093/pnasnexus/pgad026), 2023-02-01
Supplement: pgad026_supplementary_data.pdf [file pgad026_supplementary_data.pdf]

## Three-dimensional printing of patient-specific CT lung phantoms: A reader study

Supplemental Material – Figure S1 – Screenshot of the GUI for part 1:

Please open patient: R4\_1  
Please review slice number: 1

Imaging characteristics

a. Does the image have realistic imaging characteristics of a diagnostic quality CT lung scan?

Strongly disagree (the image does NOT have realistic imaging characteristics)

Disagree

Neither agree nor disagree

Agree

Strongly agree (the image has realistic imaging characteristics)

Contrast characteristics

b. Does the image have realistic contrast characteristics of a diagnostic quality CT lung scan?

Strongly disagree (the image does NOT have realistic contrast characteristics)

Disagree

Neither agree nor disagree

Agree

Strongly agree (the image has realistic contrast characteristics)

Noise characteristics

c. Does the image have realistic noise characteristics of a diagnostic quality CT lung scan?

Strongly disagree (the image does NOT have realistic noise characteristics)

Disagree

Neither agree nor disagree

Agree

Strongly agree (the image has realistic noise characteristics)

Resolution characteristics

d. Does the image have realistic resolution characteristics of a diagnostic quality CT lung scan?

Strongly disagree (the image does NOT have realistic resolution characteristics)

Disagree

Neither agree nor disagree

Agree

Strongly agree (the image has realistic resolution characteristics)

Next

Supplemental Material – Figure S2 – Screenshot of the GUI for part 2:

Please open patient: R4\_2  
Please review slice number: 1

COVID severity

a. Assuming a relevant indication, rate the severity of COVID consolidations in the image:

None

Mild

Moderate

Severe

Diagnostic confidence

b. Assuming a relevant indication, are there sufficient details (e.g., resolution, CNR) for a confident COVID diagnosis?

Not confident at all

Slightly confident

Somewhat confident

Fairly confident

Completely confident

Next
